# Supplementary material for: Adipocytokine Profile Reveals a Significant Cytokine Network in the Acute Phase of Sepsis
Source: Research Square preprint supplement (doi:10.21203/rs.3.rs-99736/v1), 2020-11-02
Supplement: Supplementary file 1 [file 11eab3cde40a41fae78f7f4f.xlsx]

## Sheet: Sheet2
Table 2. Cox proportional-hazards analysis with time-dependent covariates for 28-day survival in the patients with sepsis
	HR (95% CI)	P value
Cytokines/PAI-1
IL-1β	1.189 (0.986 – 1.435 )	0.07
IL-6	2.492 (1.591 – 3.902)	<0.001
IL-8	1.778 (1.236 – 2.558)	0.002
IL-10	1.877 (1.244 – 2.831)	0.003
MCP-1	1.039 (0.763 – 1.416)	0.009
PAI-1	1.578 (1.211 – 2.055)	<0.001
Adipocytokines
Adiponectin	1.206 (0.943 – 1.543)	0.135
Leptin	0.934 (0.787 - 1.109)	0.436
Resistin	1.967 (1.464 – 2.643)	<0.001
Chemerin	0.909 (0.666 - 1.242)	0.55
Visfatin	1.379 (0.950 - 2.000)	0.091
Combined Scores
Daily score	2.207 (1.545 – 3.153)	<0.001
Common score	1.783 (1.320 – 2.409)	<0.001
The cytokines (inflammatory, anti-inflammatory and adipogenic) and PAI-1 values and the combined scores were measured during the acute phase (day 1, day 2 and day 4). The cytokines and PAI-1 values were transformed to common logarithm values to normalize the distribution of the data. The hazard ratio is provided as Q1 to Q3. CI confidence interval, HR hazard ratio, IL-1β interleukin-1 beta, IL-6 …
